# Supplementary material for: Gold nanoparticles from self-assembled gold(i) amine precursors
Source: Royal Society of Chemistry journal article supplement (doi:10.1039/b005327i), 2000-01-01
Supplement: b005327i.doc [file b005327i.doc]

# Chem Comm b005327i

# Gold Nanoparticles from Self-assembled Gold(I) Amine Precursors

Silvia Gomeza, Karine Philippota, Vincent Collièrea, Bruno Chaudret*a, François Senocqb, Pierre Lecantec

*aLaboratoire de Chimie de Coordination du CNRS, 205, route de Narbonne, 31077 Toulouse Cédex 04, France.*

*bCIRIMAT, UMR CNRS 5085, E.N.S.C.T., 118, route de Narbonne, 31077 Toulouse Cédex 04, France.*

*cCentre d’Elaboration des Matériaux et d’Etudes Structurales du CNRS, 29, rue Jeanne Marvig BP 4347, 31055 Toulouse Cédex 04, France.*

##### Supplementary Material

**Experimental details and characterization of complexes 2-4.**

All the reactions were carried out under an argon atmosphere using classical schlenk techniques.

*WAXS Study*: Samples **2**, **3** and **4** were sealed in a Lindeman capillary. The scattering spectrum produced by the sample irradiated with graphite-monochromatized silver K radiation ( = 0,56083 Å) was obtained using a dedicated diffractometer. The experimental reduced radial distribution function (RDF), which shows the distribution of the interatomic distances, was calculated for each case.

*TEM Study*: The morphologies of **2**, **3** and **4** were studied on a JEOL 200 CX-T electron microscope operating at 200 kV. The powder was dissolved, or suspended, in THF and the resulting solution was poured onto a copper grid covered by a thin carbon film.

*TGA Study*: The temperatures were controlled from 20 to 800°C at 20°C/min. and the experiments were carried out under an helium atmosphere.

*XRD Studies :* XRD diagrams were collected with a Seifert XRD 3000 TT diffractometer, using Cu K  radiation, fitted with a back graphite monochromator.

## Evolution vs. temperature: The sample was introduced in a glass tube connected to a mercury diffusion vacuum pump and evacuated. The tube was then heated with a regulated oil bath for periods of 1 hour at the requested temperature and allowed to cool to room temperature under dynamic vacuum ( 10-4 Torr). XRD diagrams were then collected, the sample re-introduced in the glass tube and heated to the next temperature, following the same procedure, until complete evolution.

*Selected data* for **2**: IR (KBr/cm-1): 3251 and 3211 ( N-H of coordinated amine), 2951-2848 ( C-H alkyl groups); 1H NMR (298 K, CD3COCD3, 300 MHz): ** 4.86 (-N*H2*, 2H), 3.04 (m, -C*H2*-NH2, 2H), 1.75 (m, C*H2*-CH2-NH2, 2H), 1.36-1.29 (m, -(C*H2*)*5*-(CH2)2-NH2, 10H), 0.88 (t, C*H3*-, 3H); 13C NMR (298 K, CD3COCD3, 300 MHz): ** 56.98 (-*C*H2-NH2), 32.01 (-*C*H2-CH2-NH2), 30.89 (-*C*H2-(CH2)2-NH2), 29.50 (-*C*H2-(CH2)3-NH2), 29.35 (-*C*H2-(CH2)4-NH2), 26.75 (-*C*H2-(CH2)5-NH2), 22.79 (-*C*H2-(CH2)6-NH2), 13.84 (*C*H3-); TGA : 43 ± 3 % weight loss between 22 and 400°C; expected : 45.5 % corresponding to successive loss of Cl and amine ligands ; Elemental analysis: Calcd. for C8H19NClAu: C, 26.56; H, 5.25; N, 3.87; Cl, 9.81. Found: C, 26.59; H, 4.79; N, 3.86; Cl, 9.79.

For **3**: IR (KBr/ cm-1): 3247 and 3213 ( N-H of coordinated amine), 2954-2848 ( C-H alkyl groups); 1H NMR (298 K, THF-d8, 300 MHz): ** 4.76 (-N*H2*, 2H), 2.93 (m, -C*H2*-NH2, 2H), 1.69 (m, C*H2*-CH2-NH2, 2H), 1.37-1.32 (m, -(C*H2*)*9*-(CH2)2-NH2, 18H), 0.92 (t, C*H3*-, 3H); 13C NMR (298 K, THF-d8, 300 MHz): ** 47.33 (-*C*H2-NH2), 32.57 (-*C*H2-CH2-NH2), 32.29 (-*C*H2-(CH2)2-NH2), 30.02-29.72 (-(*C*H2)*6*-(CH2)3-NH2), 26.79 (-*C*H2-(CH2)9-NH2), 22.98 (-*C*H2-(CH2)10-NH2), 13.85 (*C*H3-); TGA : 51 ± 3 % weight loss between 22 and 500°C; expected : 52.8 % corresponding to loss of Cl and amine ligands ; Elemental analysis: Calcd. for C12H27NClAu: C, 34.49; H, 6.47; N, 3.35; Cl, 8.49. Found: C, 34.50; H, 6.44; N, 3.25; Cl, 8.47.

For **4**: IR (KBr/ cm-1): 3245 and 3212 ( N-H of coordinated amine), 2952-2848 ( C-H alkyl groups); 1H NMR (298 K, THF-d8, 300 MHz): ** 4.76 (-N*H2*, 2H), 2.93 (m, -C*H2*-NH2, 2H), 1.68 (m, C*H2*-CH2-NH2, 2H), 1.37-1.33 (m, -(C*H2*)*13*-(CH2)2-NH2, 26H), 0.92 (t, C*H3*-, 3H); 13C NMR (298 K, THF-d8, 300 MHz): ** 47.32 (-*C*H2-NH2), 32.57 (-*C*H2-CH2-NH2), 32.28 (-*C*H2-(CH2)2-NH2), 30.02-29.71 (-(*C*H2)*10*-(CH2)3-NH2), 26.78 (-*C*H2-(CH2)13-NH2), 22.98 (-*C*H2-(CH2)14-NH2), 13.85 (*C*H3-); TGA : 60 ± 3 % weight loss between 22 and 600°C; expected : 58.4 % corresponding to loss of Cl and amine ligands ; Elemental analysis: Calcd. for C16H35NClAu: C, 40.55; H, 7.39; N, 2.95; Cl, 7.49. Found: C, 40.33; H, 7.17; N, 2.84; Cl, 6.64.
